# Supplementary material for: Chemical repair mechanisms of damaged tyrosyl and tryptophanyl residues in proteins by the superoxide radical anion
Source: Royal Society of Chemistry journal article supplement (doi:10.1039/c9nj04998c), 2020-01-01
Supplement: c9nj04998c1.pdf [file c9nj04998c1.pdf]

## ELECTRONIC SUPPLEMENTARY INFORMATION FOR:

# Chemical repair mechanisms of protein by the superoxide radical anion

Leonardo Muñoz-Rugeles<sup>1\*</sup>, Annia Galano<sup>2</sup> and Juan Raúl Alvarez-Idaboy<sup>1\*</sup>

<sup>1</sup>Facultad de Química, Departamento de Física y Química Teórica, Universidad Nacional Autónoma de México, México DF 04510, México.

<sup>2</sup>Departamento de Química, Universidad Autónoma Metropolitana-Iztapalapa. San Rafael Atlixco 186, Col. Vicentina. Iztapalapa. C. P. 09340. México D. F. México

| Contents:                                                                                                                                                                                                                                                                                                                                                                                                                                                                                          | Pag. |
|----------------------------------------------------------------------------------------------------------------------------------------------------------------------------------------------------------------------------------------------------------------------------------------------------------------------------------------------------------------------------------------------------------------------------------------------------------------------------------------------------|------|
| <b>Figure S1.</b> Molecular models of (a) tyrosine and (b) tryptophan residues.....                                                                                                                                                                                                                                                                                                                                                                                                                | 2    |
| <b>Figure S2.</b> Influence of the pH on overall rate constant ( $k_{\text{overall}}$ ) and the two components (single electron transfer, $k_{\text{SET}}$ , and proton coupled-electron transfer, $k_{\text{PCET}}$ ), in the repair of TyrO• by the two fraction of superoxide radical anion ( $\text{O}_2^{\bullet-}$ and $\text{HO}_2^{\bullet}$ ) at 298.15 K.....                                                                                                                            | 2    |
| <b>Figure S3.</b> Non-covalent $\pi$ - $\pi$ stacking interactions for the highest doubly occupied molecular orbital at triplet transition state geometry for reaction between TyrO• and $\text{HO}_2^{\bullet}$ .....                                                                                                                                                                                                                                                                             | 2    |
| <b>Figure S4.</b> Total electron densities difference for the complexes for the vertical electron transfer in the hydrogen bond complex [ $\text{Trp}^{\bullet+} \cdots \text{O}_2^{\bullet-}$ ]. Purple and blue zones are related to the electron density rise and decrease, respectively.....                                                                                                                                                                                                   | 3    |
| <b>Figure S5.</b> Pre-equilibrium reaction and parameters used in the kinetic analyses of the SPGET mechanism between $\text{Trp}^{\bullet+}$ and $\text{O}_2^{\bullet-}$ . Structures and spin densities are shown. The first elementary (SPGET-1) corresponding to the protonation of $\text{Trp}_{(-\text{H})}^{\bullet}$ is not included.....                                                                                                                                                  | 3    |
| <b>Figure S6.</b> Influence of the pH on overall rate constant ( $k_{\text{overall}}$ ) and the three components (single electron transfer, $k_{\text{SET}}$ , proton coupled-electron transfer, $k_{\text{PCET}}$ , and sequential proton gain-electron transfer, $k_{\text{SPGET}}$ ), in the repair of the $\text{Trp}^{\bullet}$ and $\text{Trp}^{\bullet+}$ radicals by the two fraction of superoxide radical anion ( $\text{O}_2^{\bullet-}$ and $\text{HO}_2^{\bullet}$ ) at 298.15 K..... | 4    |

\* To whom correspondence should be addressed. E-mails: [leomunozr@comunidad.unam.mx](mailto:leomunozr@comunidad.unam.mx), [jidaboy@unam.mx](mailto:jidaboy@unam.mx)

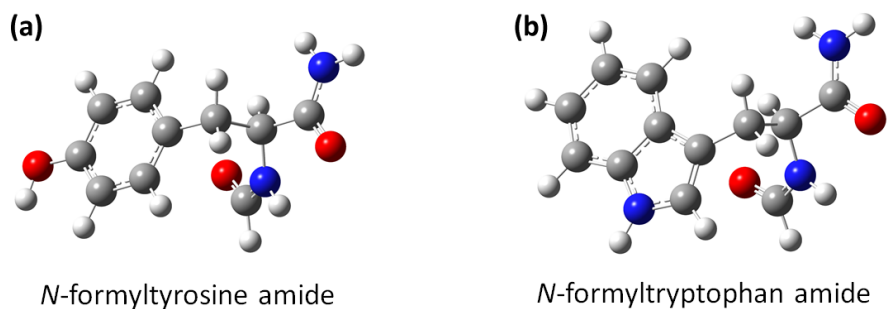

**Figure S1.** Molecular models of (a) tyrosine and (b) tryptophan residues.

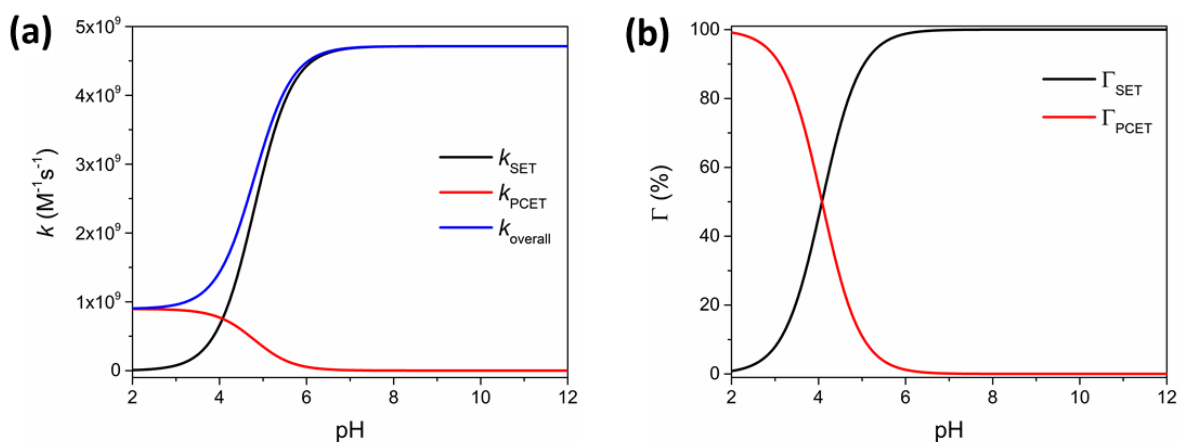

**Figure S2.** Influence of the pH on overall rate constant ( $k_{overall}$ ) and the two components (single electron transfer,  $k_{SET}$ , and proton coupled-electron transfer,  $k_{PCET}$ ), in the repair of  $TyrO^\bullet$  by the two fraction of superoxide radical anion ( $O_2^{\bullet-}$  and  $HO_2^\bullet$ ) at 298.15 K. (a) Rate constants ( $k$ ,  $M^{-1}s^{-1}$ ) and (b) branching ratios ( $\Gamma$ , %).

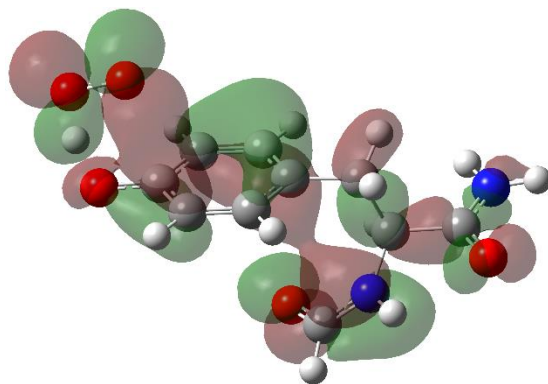

**Figure S3.** Non-covalent  $\pi$ - $\pi$  stacking interactions for the highest doubly occupied molecular orbital at triplet transition state geometry for reaction between  $TyrO^\bullet$  and  $HO_2^\bullet$ .

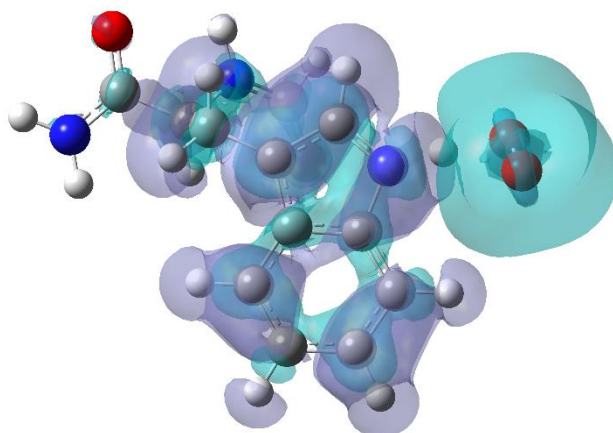

**Figure S4.** Total electron densities difference for the complexes for the vertical electron transfer in the hydrogen bond complex  $[\text{Trp}^{\bullet+} \cdots \text{O}_2^{\bullet-}]$ . Purple and blue zones are related to the electron density rise and decrease, respectively.

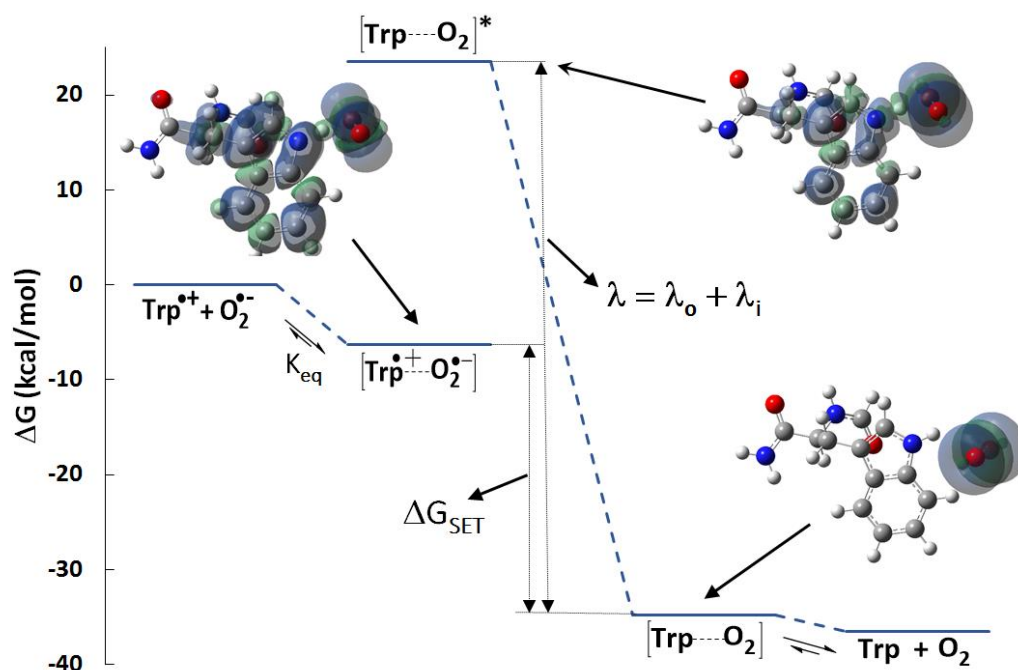

**Figure S5.** Pre-equilibrium reaction and parameters used in the kinetic analyses of the SPGET mechanism between  $\text{Trp}^{\bullet+}$  and  $\text{O}_2^{\bullet-}$ . Structures and spin densities are shown. The first elementary (SPGET-1) corresponding to the protonation of  $\text{Trp}_{(H)}^{\bullet+}$  is not included.

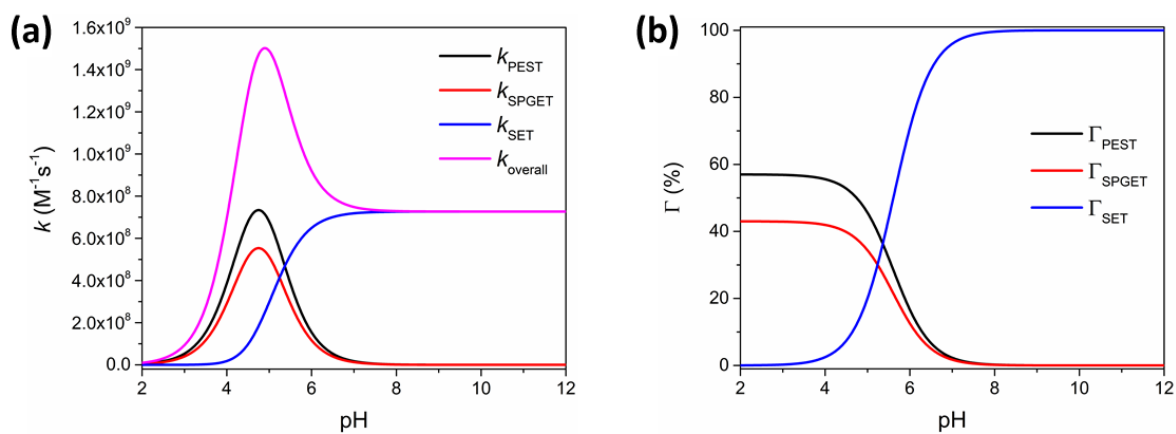

**Figure S6.** Influence of the pH on overall rate constant ( $k_{overall}$ ) and the three components (single electron transfer,  $k_{SET}$ , proton coupled-electron transfer,  $k_{PCET}$ , and sequential proton gain-electron transfer,  $k_{SPGET}$ ), in the repair of the Trp• and Trp•+ radicals by the two fraction of superoxide radical anion ( $O_2^{\bullet-}$  and  $HO_2^{\bullet}$ ) at 298.15 K. (a) Rate constants ( $k$ ,  $M^{-1}s^{-1}$ ) and (b) branching ratios ( $\Gamma$ , %).
